# Supplementary material for: Enhanced multi-lineage differentiation of human mesenchymal stem/stromal cells within poly(N-isopropylacrylamide-acrylic acid) microgel-formed three-dimensional constructs
Source: Royal Society of Chemistry journal article supplement (doi:10.1039/c8tb00376a), 2018-01-01
Supplement: c8tb00376a1.pdf [file c8tb00376a1.pdf]

## Supplementary Information

# Enhanced Multi-Lineage Differentiation of Human Mesenchymal Stem/Stromal Cells within Poly (N- isopropylacrylamide-Acrylic Acid) Microgel- Formed Three-Dimensional Constructs

*Jiabin Zhang<sup>1</sup>, Seonho Yun<sup>1</sup>, Jingxiu Bi<sup>1</sup>, Sheng Dai<sup>1</sup>, Yuguang Du<sup>3</sup>, Andrew C.W.*

*Zannettino<sup>2\*</sup>, Hu Zhang<sup>1\*</sup>*

<sup>1</sup>School of Chemical Engineering, The University of Adelaide, Adelaide, SA 5005, Australia

<sup>2</sup>Adelaide Medical School, The University of Adelaide, Adelaide, SA 5001, Australia

<sup>3</sup>Institute of Process Engineering, Chinese Academy of Sciences, Beijing, 100190, China

\*Corresponding author: E-mail: hu.zhang@adelaide.edu.au (H.Z.), E-mail:  
andrew.zannettino@adelaide.edu.au (A.C.W.Z.)

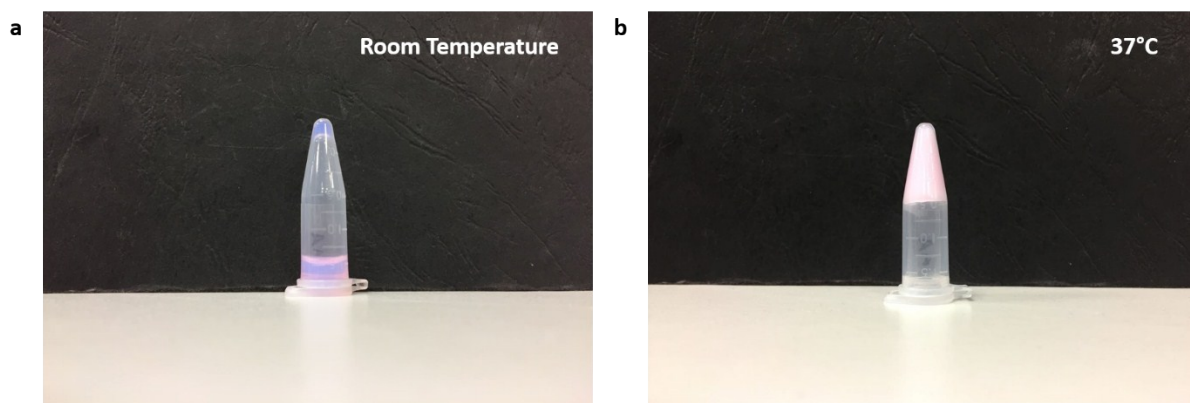

**Figure S1** Thermosensitive behaviour of p(NIPAAm-AA) microgel-formed 3D constructs. (a) sol status at room temperature and (b) gel status at 37°C.

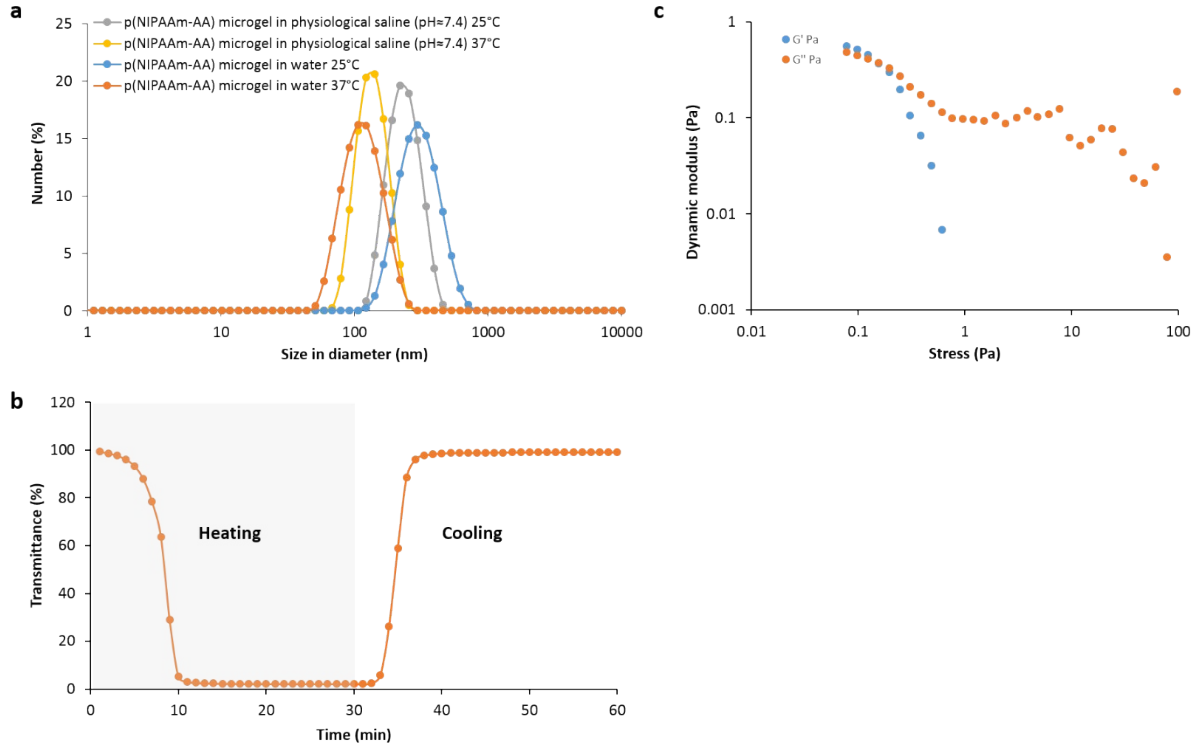

**Figure S2** (a) Size distribution of 0.5 mg/mL p(NIPAAm-AA) microgels in Milli-Q<sup>®</sup> water or 1×DPBS (pH  $\approx$  7.4) at 25°C and 37 °C. (b) Time-dependent gelation process was investigated by measuring the transmittance (%) of the p(NIPAAm-AA) microgel-formed three-dimensional (3D) constructs heating from 0 to 30 min and cooling from 31 to 60 min with a wavelength of 720 nm light. (c) The stress dependence of the dynamic moduli (elastic modulus  $G'$  and viscous modulus  $G''$ ) of 30 mg/mL p(NIPAAm-AA) microgel-formed constructs at 37 °C.

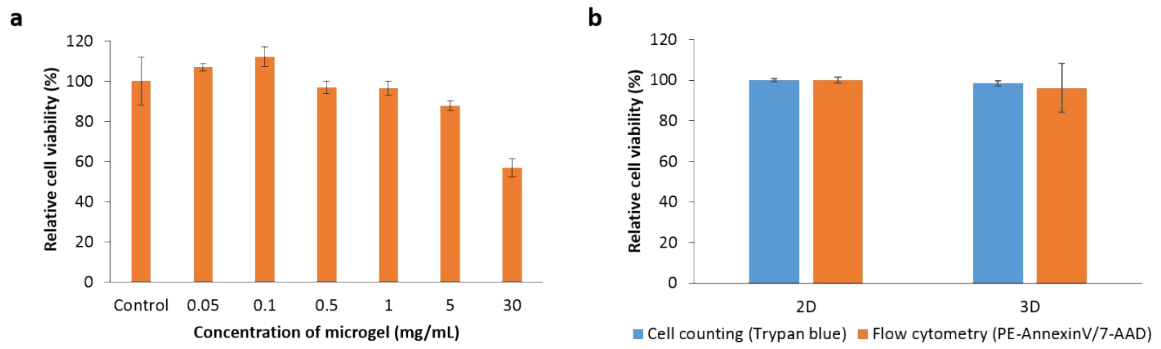

**Figure S3** UE7T-13 cell viability assay after 24 hours. (a) Surface toxicity assay of various concentration of p(NIPAAm-AA) microgel by MTT. Control: without microgel. The MTT absorbance was normalized to the control and presented as relative cell viability. (b) 3D toxicity assay of microgel at the concentration of 30mg/mL by cell counting with trypan blue staining or flow cytometry with PE-AnnexinV and 7-AAD double staining. 2D: cells cultured on the multi-well plate; 3D: cells cultured within the thermosensitive p(NIPAAm-AA) microgel-formed constructs. The cell viability was normalized to 2D and presented as relative cell viability. Results were mean  $\pm$  standard error (n=3). No significant difference was found between 2D and 3D.

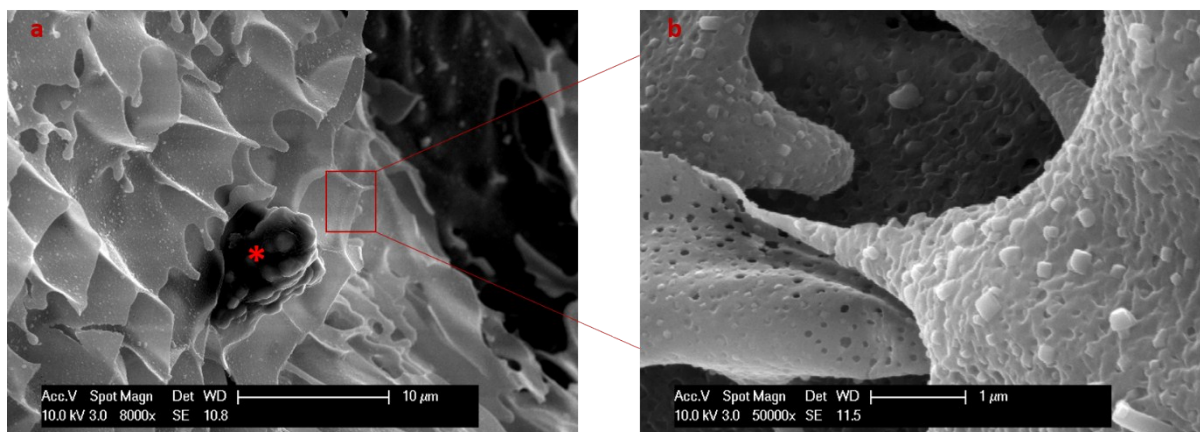

**Figure S4** SEM images of the cross-sectional p(NIPAAm-AA) microgel-formed 3D construct.

The microgel-formed constructs were quickly freezed in liquid nitrogen when at gel status and dried under vacuum. (a) UE7T-13 cells were cultured in the 3D construct on day 1. The asterisk showed an incorporated cell within p(NIPAAm-AA) microgel-formed 3D constructs. (b) Morphology of the 3D construct at higher magnification.

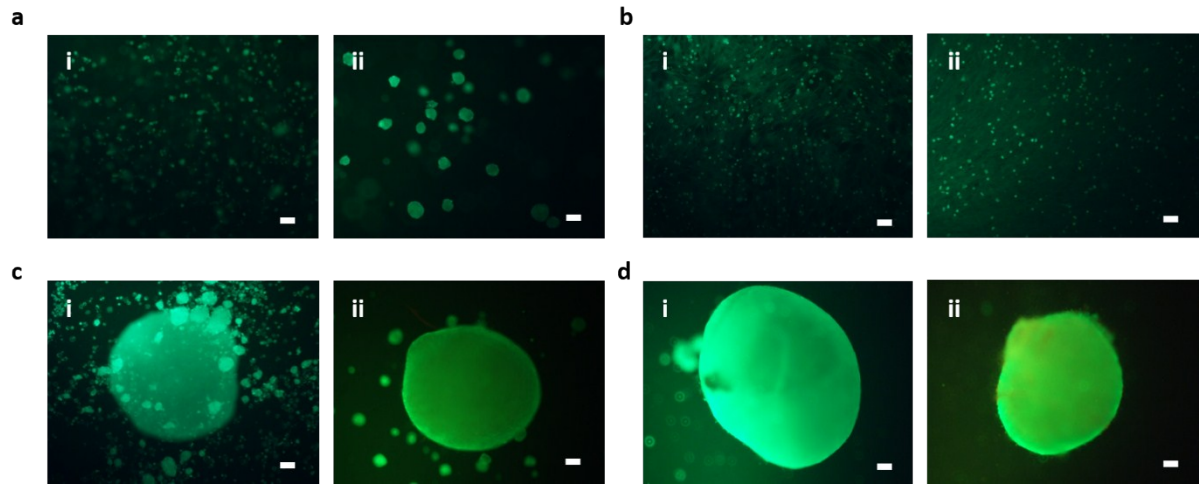

**Figure S5** Fluorescent images of UE7T-13 cells cultured (a) in the thermosensitive p(NIPAAm-AA) microgel-formed 3D constructs with an additional layer of p(NIPAAm-AA) microgel coating on the bottom; (b) in the thermosensitive p(NIPAAm-AA) microgel-formed 3D constructs without p(NIPAAm-AA) coating; (c) on the low attachment surface; (d) in the polypropylene tube for (i) 1 day and (ii) 9 days by calcein AM and ethidium homodimer-1 double staining. Green: live cells; Red: dead cells. Scale bar: 100  $\mu\text{m}$ .

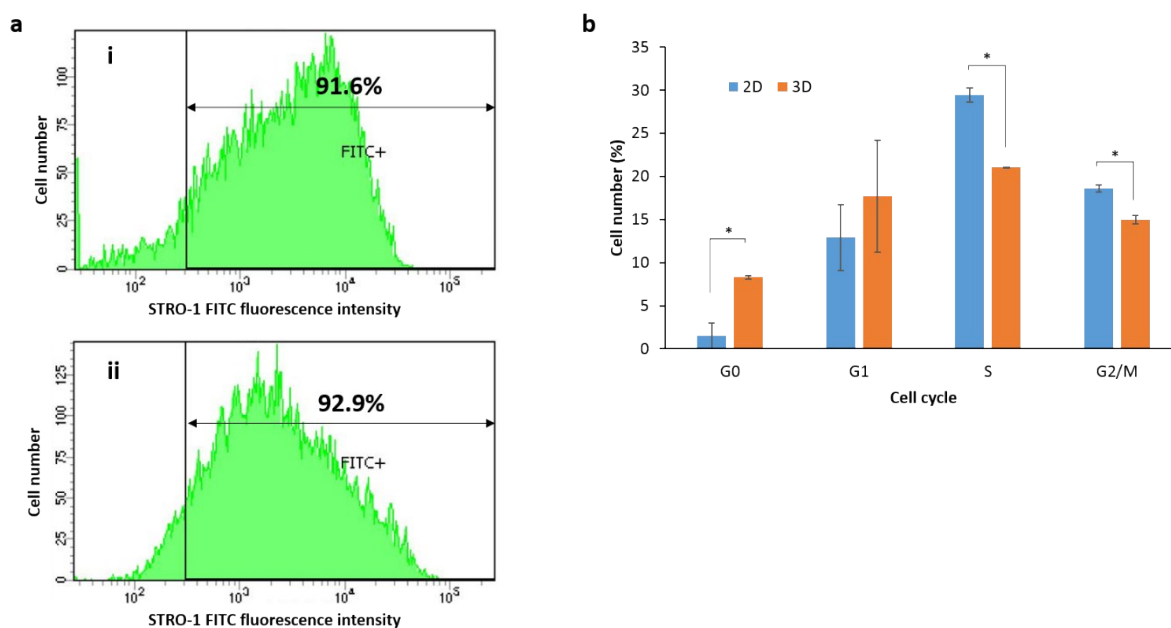

**Figure S6** (a) Representative STRO-1 flow cytometry of UE7T-13 in (i) 2D and (ii) 3D. The percentage of fluorescein isothiocyanate (FITC)-labelled STRO-1 positive cells for 2D and 3D was 91.6% and 92.9%, respectively. (b) Cell cycle assay of UE7T-13 in 2D and 3D by FITC-labelled KI-67 antibody and propidium iodide (PI) double staining flow cytometry. Data was presented as the mean  $\pm$  standard error ( $n=3$ ).  $*p < 0.05$ . 2D: cells were cultured on the two-dimensional plates; 3D: Cells were cultured in the p(NIPAAm-AA) microgel-formed three-dimensional constructs.
